# Supplementary material for: Sleep and Dietary Patterns in Pregnancy: Findings from the GUSTO Cohort
Source: MDPI journal article supplement (doi:10.3390/ijerph14111409), 2017-11-17
Supplement: s1 [file s1]

**Table S1.** Factor loading matrix for the 3 major dietary patterns identified by using 24-h recalls in the complete GUSTO cohort (n=1170) and subsample with complete data on sleep quality (n=497)

| Food or Food groups                                       | Vegetable, Fruit and white<br>Rice diet (VFR) |           | Seafood and Noodle diet<br>(SfN) |           | Pasta, Cheese and<br>Processed meat (PCP) |           |
|-----------------------------------------------------------|-----------------------------------------------|-----------|----------------------------------|-----------|-------------------------------------------|-----------|
|                                                           | Complete<br>sample                            | Subsample | Complete<br>sample               | subsample | Complete<br>sample                        | subsample |
| Cruciferous, leafy-green<br>and dark-yellow<br>vegetables | 0.53                                          | 0.39      | -                                | -         | -                                         | -         |
| Other vegetables <sup>2</sup>                             | 0.44                                          | 0.32      | -                                | -         | -                                         | -         |
| Fried potatoes                                            | -0.42                                         | -0.33     | -                                | -         | -                                         | -         |
| Fruits                                                    | 0.39                                          | -         | -                                | -         | -                                         | -         |
| Hamburger                                                 | -0.34                                         | -0.30     | -                                | -         | -                                         | -         |
| White rice                                                | 0.34                                          | 0.26      | -0.28                            | -0.24     | -                                         | -         |
| Carbonated drinks                                         | -0.32                                         | -0.26     | -                                | -         | -                                         | -         |
| Flavoured rice                                            | -0.30                                         | -0.24     | -                                | -         | -                                         | -         |
| Whole-grain bread                                         | 0.29                                          | 0.28      | -                                | -         | -                                         | -         |
| Sweetened drinks <sup>3</sup>                             | -0.26                                         | -0.26     | -                                | -         | -                                         | -         |
| Red meat and<br>poultry(Deep fried/in<br>curry)           | -0.25                                         | -0.25     | -                                | -         | -                                         | -         |
| Non-fried fish                                            | 0.22                                          | -         | -                                | -         | -                                         | -         |
| Milk-based drinks                                         | -0.21                                         | -         | -                                | -         | -                                         | -         |
| Nuts and seeds                                            | 0.21                                          | -         | -                                | -         | -                                         | -         |
| Soup                                                      | -                                             | -         | 0.52                             | 0.54      | -                                         | -         |
| Ethnic bread <sup>4</sup>                                 | 0.21                                          | 0.23      | -0.43                            | -0.28     | -                                         | -         |
| Fish and seafood<br>products                              | -                                             | -         | 0.43                             | 0.36      | -                                         | -         |
| Noodles (in soup)                                         | -                                             | -         | 0.41                             | 0.45      | -                                         | -         |
| Legumes and pulses                                        | 0.21                                          | 0.21      | -0.41                            | -0.22     | -                                         | -         |
| Flavoured noodles                                         | -                                             | -         | 0.39                             | -         | -                                         | -         |
| Low fat red meat                                          | -                                             | -         | 0.35                             | 0.32      | -                                         | -         |
| Seafood                                                   | -                                             | -         | 0.29                             | -         | -                                         | -         |
| Curry based gravies                                       | -                                             | -         | -0.27                            | -         | -                                         | -         |
| Soya sauce based gravies                                  | -                                             | -         | 0.26                             | -         | -                                         | -         |
| Other grains <sup>5</sup>                                 | -                                             | -         | -0.23                            | -         | -                                         | -         |
| Eggs                                                      | -                                             | -         | 0.21                             | -         | -                                         | -         |
| Local savoury snacks                                      | -                                             | -         | 0.21                             | -         | -                                         | -         |
| Pasta                                                     | -                                             | -         | -                                | -         | 0.81                                      | 1.00      |
| Tomato based gravies                                      | -                                             | -         | -                                | -         | 0.69                                      | 0.56      |
| Cream based gravies                                       | -                                             | -         | -                                | -         | 0.46                                      | 0.32      |
| Cheese                                                    | -                                             | -         | -                                | -         | 0.45                                      | -         |
| Processed meats                                           | -                                             | -         | -                                | -         | 0.27                                      | -         |
| Correlation between<br>complete and subsample             |                                               | 0.95      |                                  | 0.94      |                                           | 0.32      |

<sup>1</sup> values  $< 0.20$  were not listed in the table for simplicity; <sup>2</sup> Vegetables other than cruciferous, leafy-green and dark-yellow vegetables; <sup>3</sup> Non-carbonated, cordial and fruit drinks; <sup>4</sup> Chinese steamed bun, tortilla, idli, puri, thosai, chapati, naan; <sup>5</sup> Uppuma, millet, corn, glutinous rice.
